# Supplementary material
Source: MDPI journal article supplement (https://www.mdpi.com/search?q=molecules-23-02926)
Supplement: s001 [file molecules-23-02926-s001.pdf]

1 *Supplementary information*

2 **Investigation of new orexin 2 receptor modulators**  
 3 **using *in silico* and *in vitro* methods**

4 **Jana Janockova** <sup>1,3,#</sup>, **Rafael Dolezal** <sup>1,3,5,#</sup>, **Eugenie Nepovimova** <sup>3</sup>, **Tereza Koblrova** <sup>1,2</sup>, **Marketa**  
 5 **Benkova** <sup>1</sup>, **Kamil Kuca** <sup>1,3</sup>, **Jan Konecny** <sup>1,2</sup>, **Eva Mezeiova** <sup>1</sup>, **Michaela Melikova** <sup>3</sup>, **Vendula**  
 6 **Hepnarova** <sup>1,2</sup>, **Avi Ring** <sup>4</sup>, **Ondrej Soukup** <sup>1,\*</sup> and **Jan Korabecny** <sup>1,\*</sup>

7 <sup>1</sup> Biomedical Research Centre, University Hospital Hradec Kralove, Sokolska 581, 500 05 Hradec Kralove,  
 8 Czech Republic; [jana.janockova@fnhk.cz](mailto:jana.janockova@fnhk.cz) (J.J.), [Rafael.dolezal@fnhk.cz](mailto:Rafael.dolezal@fnhk.cz) (R.D.), [tereza.koblrova@fnhk.cz](mailto:tereza.koblrova@fnhk.cz) (T.K.),  
 9 [marketa.benkova@fnhk.cz](mailto:marketa.benkova@fnhk.cz) (M.B.), [kamil.kuca@fnhk.cz](mailto:kamil.kuca@fnhk.cz) (K.K.), [jan.konecny@fnhk.cz](mailto:jan.konecny@fnhk.cz) (J.Kon.),  
 10 [eva.mezeiova@fnhk.cz](mailto:eva.mezeiova@fnhk.cz) (E.M.), [ondrej.soukup@fnhk.cz](mailto:ondrej.soukup@fnhk.cz) (O.S.), [jan.korabecny@fnhk.cz](mailto:jan.korabecny@fnhk.cz) (J.Kor.)

11 <sup>2</sup> Department of Toxicology and Military Pharmacy, Faculty of Military Health Sciences, University of  
 12 Defence, Trebesska 1575, 500 05 Hradec Kralove, Czech Republic; [vendula.hepnarova@unob.cz](mailto:vendula.hepnarova@unob.cz) (V.H.)

13 <sup>3</sup> Department of Chemistry, Faculty of Science, University of Hradec Kralove, Rokitanskeho 62, 500 03 Hradec  
 14 Kralove, Czech Republic; [eugenie.nepovimova@uhk.cz](mailto:eugenie.nepovimova@uhk.cz) (E.N.), [michaela.melikova@upol.cz](mailto:michaela.melikova@upol.cz) (M.M)

15 <sup>4</sup> Norwegian Defence Research Establishment, Gunnar Randersvei 42, 2007 Kjeller, Norway; [avi.ring@ffi.no](mailto:avi.ring@ffi.no)

16 <sup>5</sup> Center for Basic and Applied Research, University of Hradec Kralove, Rokitanskeho 62, 500 03 Hradec  
 17 Kralove, Czech Republic;

18 # J.J. and R.D. contributed equally

19 \* Correspondence: [jan.korabecny@fnhk.cz](mailto:jan.korabecny@fnhk.cz), Tel.: +420-973-255-167; [ondrej.soukup@fnhk.cz](mailto:ondrej.soukup@fnhk.cz), Tel.: +420-495-833-  
 20 447

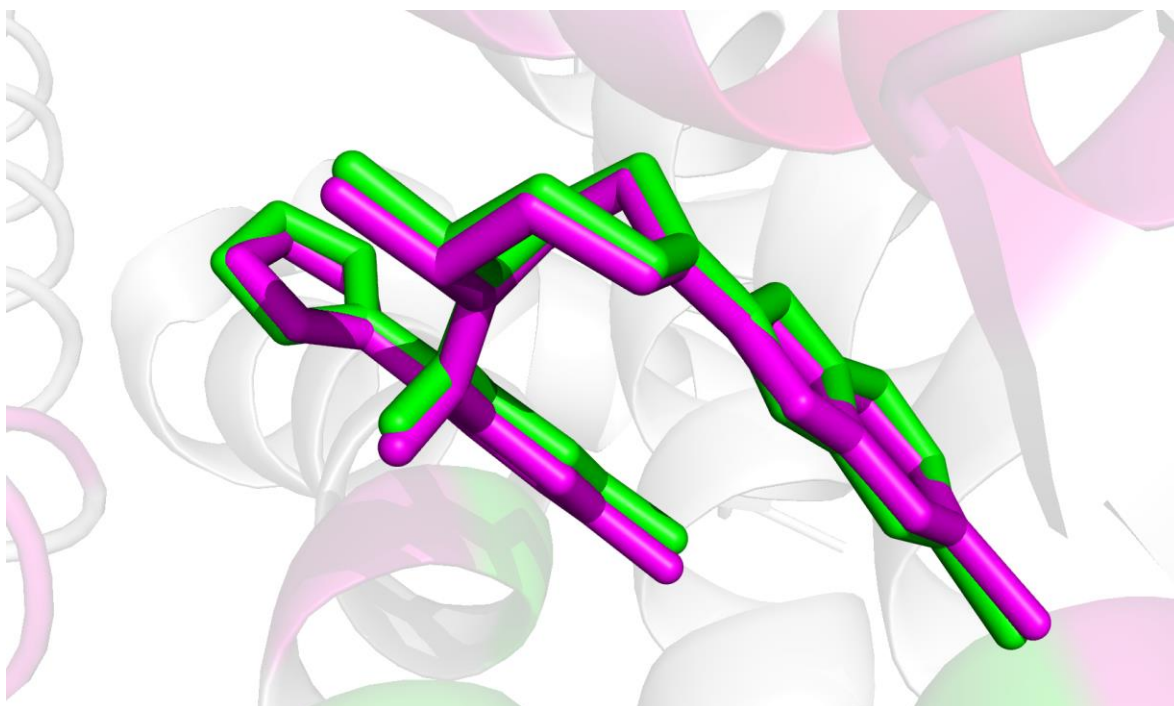

21

22 **Figure S1.** Superposition of the suvorexant binding mode in OX2R determined by X-ray (colored in  
 23 magenta, PDB ID: 4S0V) and by molecular docking in AutoDock Vina (colored in green). The resulting  
 24 RMSD of the two poses is 0.185 Å.

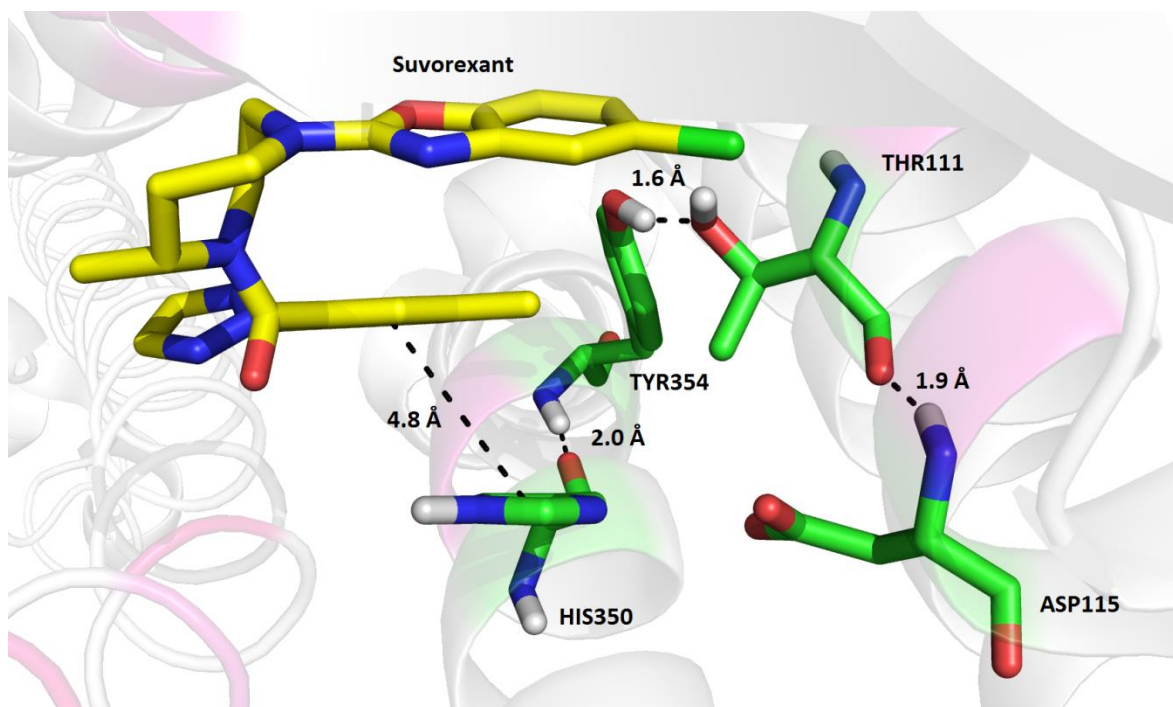

25

26 **Figure S2.** Interactions among the residues of agonistic tetrad (colored in green) in OX2R inhibited by  
 27 suvorexant (i.e. PDB ID: 4S0V).

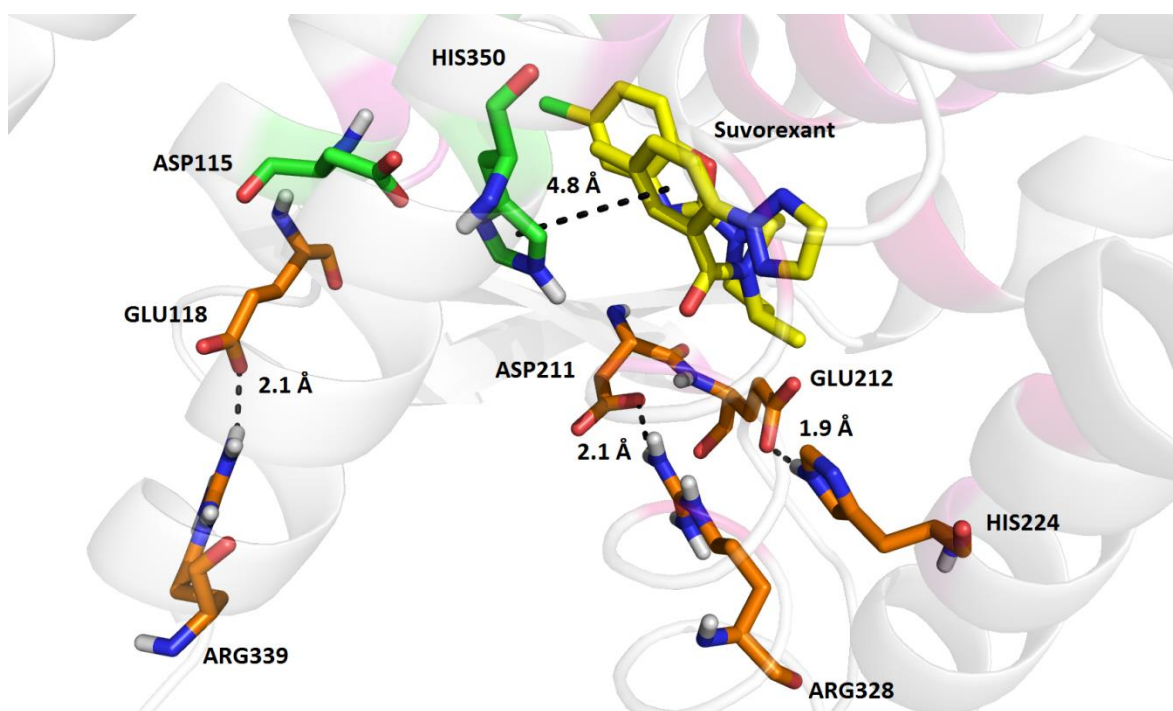

28

29 **Figure S3.** Interactions of other residues in OX2R inhibited by suvorexant (PDB ID: 4S0V), which are  
 30 considered to stabilize the inactivated conformation of OX2R.

31

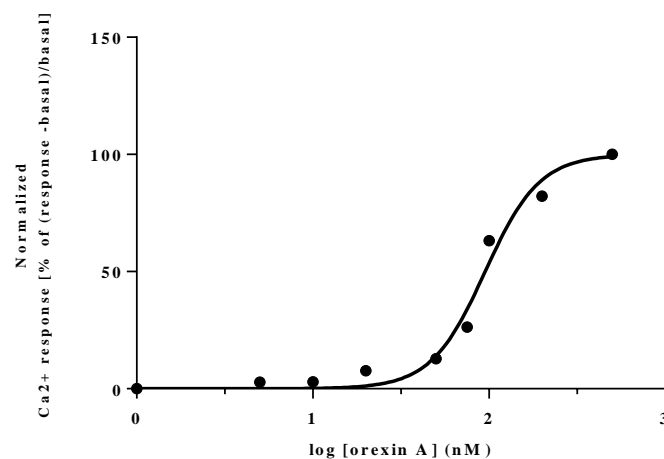

32 **Figure S4.** Typical dose-response effect by orexin A (0 - 500nM) stimulation. Responses are presented as  
33 fluorescence increase above the baseline (response-basal)/basal and are normalized to the baseline  
34 (0%) and the maximum concentration of orexin A (100%) at  $F_{485nm}/F_{528nm}$ . Values are the means of  
35 triplicate.

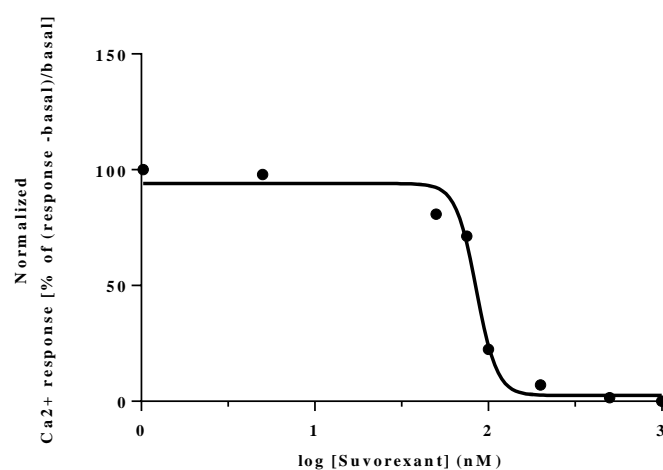

36 **Figure S5.** Typical dose-response effect of suvorexant after orexin A (100 nM) stimulation. Responses  
37 are presented as (response-basal)/basal and are normalized to the baseline (100%) and the maximum  
38 concentration of suvorexant (0%) at  $F_{485nm}/F_{528nm}$ . Values are the means triplicate.

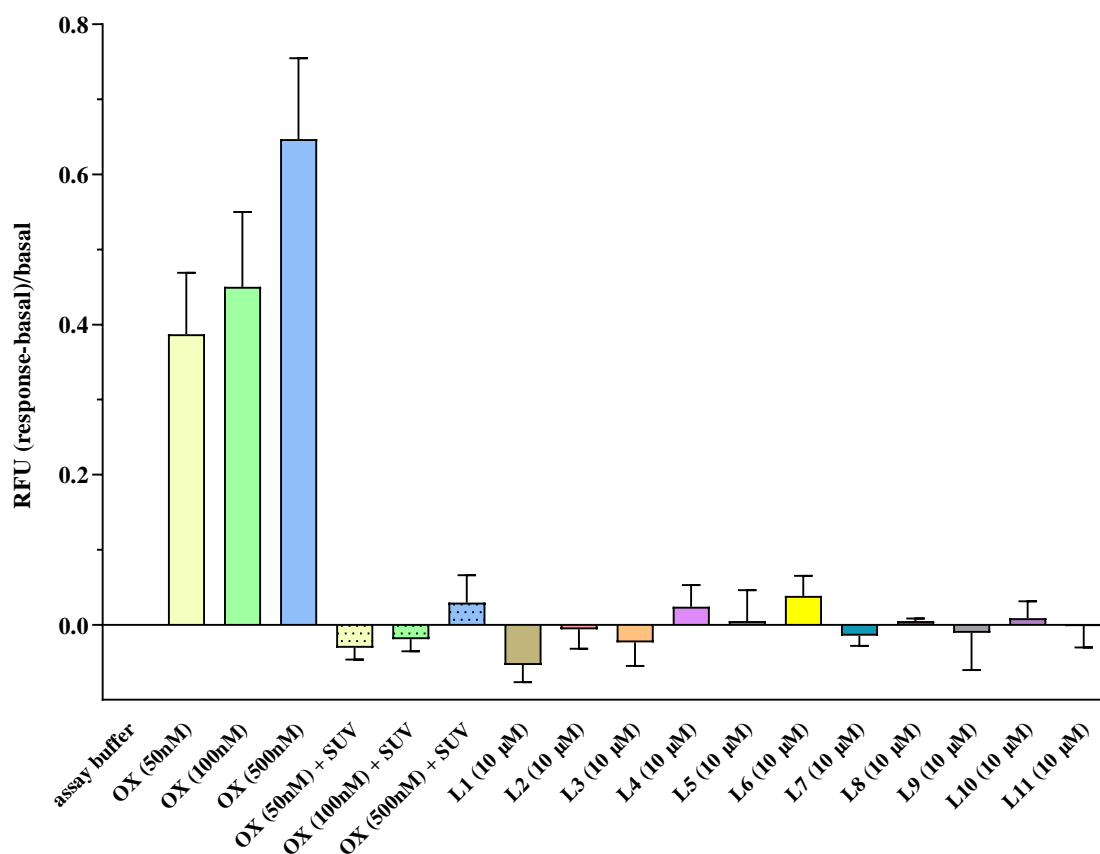

39 **Figure S6.** The screening of agonistic activity of ligands L1-L11 (10 µM) on OX2R. OX = orexin, SUV  
 40 = suvorexant.

41 **Table S1.** *In silico* analysis of aggregation potency by Tanimoto similarity (TS) with know aggregators  
 42 (<http://advisor.docking.org/>).

| Ligand     | TS with known aggregators |
|------------|---------------------------|
| L1         | - <sup>1</sup>            |
| L2         | 71 %                      |
| L3         | 70                        |
| L4         | - <sup>1</sup>            |
| L5         | - <sup>1</sup>            |
| L6         | 71 %                      |
| L7         | - <sup>1</sup>            |
| L8         | - <sup>1</sup>            |
| L9         | - <sup>1</sup>            |
| L10        | - <sup>1</sup>            |
| L11        | - <sup>1</sup>            |
| Suvorexant | - <sup>1</sup>            |

43 <sup>1</sup> The test revealed no significant TS of the structure with known aggregators.

44 **Table S2.** Evaluation of identity and uncalibrated purity of L1 – L11 with LC-UV-HRMS.

| Ligand | Predicted [M+H] <sup>+</sup> | Measured [M+H] <sup>+</sup> | Uncalibrated purity at 254 nm [%] |
|--------|------------------------------|-----------------------------|-----------------------------------|
| L1     | 491.25539                    | 491.25531                   | 97.29                             |
| L2     | 465.15910                    | 465.15897                   | 96.06                             |
| L3     | 470.17105                    | 470.17126                   | 94.35                             |
| L4     | 496.17794                    | 496.17755                   | 92.31                             |
| L5     | 516.20168                    | 516.20197                   | 89.26                             |
| L6     | 456.15540                    | 456.15527                   | 99.04                             |
| L7     | 511.19107                    | 511.19110                   | 99.31                             |
| L8     | 415.17647                    | 415.17645                   | 98.29                             |
| L9     | 440.16163                    | 440.16141                   | 99.87                             |
| L10    | 385.15467                    | 385.15463                   | 94.59                             |
| L11    | 419.14264                    | 419.14236                   | 94.05                             |
